# Supplementary material for: g-ZnO/Si9C15: a S-scheme heterojunction with high carrier mobility for photo-electro catalysis of water splitting
Source: Royal Society of Chemistry journal article supplement (doi:10.1039/d3cp04933g), 2024-01-01
Supplement: d3cp04933g1.pdf [file d3cp04933g1.pdf]

## Supplementary Material for

# **g-ZnO/Si<sub>9</sub>C<sub>15</sub>: A S-scheme Heterojunction with High Carrier Mobility for Photo-electro Catalysis Water Splitting**

Yang Shen <sup>1,\*</sup>, Zhihao Yuan <sup>1</sup>, Zhen Cui <sup>2,\*</sup>, Deming Ma <sup>1</sup>, Pei Yuan <sup>1</sup>, Fengjiao Cheng <sup>3</sup>, Kunqi Yang <sup>1</sup>, Yanbo Dong <sup>1</sup> and Enling Li <sup>1,\*</sup>

<sup>1</sup> School of Science, Xi'an University of Technology, Xi'an 710054, China;

<sup>2</sup> School of Automation and Information Engineering, Xi'an University of Technology, Xi'an 710048, China

<sup>3</sup> School of Electrical Engineering, Xi'an University of Technology, Xi'an 710054, China

\* Correspondence: shenyang@xaut.edu.cn; zcui@xaut.edu.cn; lienling@xaut.edu.cn

### **Part A: The calculation method of carrier mobility**

The carrier mobility is calculated as follows:

$$\mu = \frac{e\hbar^3 C_{2D}}{k_B T m_e^* m_d (E_1^i)^2} \quad (1)$$

where  $e$ ,  $\hbar$ ,  $k_B$ ,  $T$ ,  $m_e^*$ , and  $m_d$  are electron charge, simplify Planck constant, Boltzmann constant, temperature, the direction of Zigzag and Armchair orientation effective quality, and average effective quality. Further,  $m_d$  is determined by the following formula:  $m_d = \sqrt{m_x^* m_y^*}$ . The  $E_1^i$  is the potential deformation constant of electrons and holes in the direction of transmission in the CBM or VBM, the calculation formula is:  $E_1^i = \Delta E_i / (\Delta l / l_0)$ , where  $\Delta E_i$  (i for CBM or VBM) is the energy change of CBM or VBM under external strain, and  $\Delta l$  is the deformation of  $l_0$  with strain. The calculation equation for the elastic modulus ( $C_{2D}$ ) of the two-dimensional material is as follows:

$C_{2D} = [\partial^2 E / \partial l^2]$ , where  $E$ ,  $l$ , and  $S_0$  are the total strain energy, applied strain, and Lattice area of the two-dimensional system at equilibrium, respectively.

**Part B: The calculation method of the Solar to hydrogen (STH) efficiency and corrected STH efficiency**

The STH efficiency is:

$$\eta_{\text{STH}} = \eta_{\text{abs}} \times \eta_{\text{cu}} \quad (2)$$

where  $\eta_{\text{abs}}$  and  $\eta_{\text{cu}}$  are the efficiency of light absorption and carrier utilization, respectively.

The  $\eta_{\text{abs}}$  is calculated by:

$$\eta_{\text{abs}} = \frac{\int_{E_g}^{\infty} P(h\omega) d(h\omega)}{\int_0^{\infty} P(h\omega) d(h\omega)} \quad (3)$$

where  $P(h\omega)$  is the AM 1.5G standard solar spectrum at the photon energy  $h\omega$ , and  $E_g$  represents the bandgap of the g-ZnO/Si<sub>9</sub>C<sub>15</sub> heterojunction.

The  $\eta_{\text{cu}}$  is determined as:

$$\eta_{\text{cu}} = \frac{\Delta G \int_{E_{\text{min}}}^{\infty} \frac{P(h\omega)}{h\omega} d(h\omega)}{\int_{E_g}^{\infty} P(h\omega) d(h\omega)} \quad (4)$$

where  $\Delta G$  equals to 1.23 eV for water splitting. The  $E_{\text{min}}$  is the energy of photons, which can be determined by:

$$E_{\text{min}} = \begin{cases} E_g, & , , & (\chi(\text{H}_2) \geq 0.2 \quad \chi(\text{O}_2) \geq 0.6) \\ E_g + 0.2 - \chi(\text{H}_2), & , , & (\chi(\text{H}_2) < 0.2 \quad \chi(\text{O}_2) \geq 0.6) \\ E_g + 0.6 - \chi(\text{O}_2), & , , & (\chi(\text{H}_2) \geq 0.2 \quad \chi(\text{O}_2) < 0.6) \\ E_g + 0.8 - \chi(\text{H}_2) - \chi(\text{O}_2), & , & (\chi(\text{H}_2) < 0.2 \quad \chi(\text{O}_2) < 0.6). \end{cases} \quad (5)$$

where the  $\chi(\text{H}_2)$  and  $\chi(\text{O}_2)$  are the potential provided (shown in Fig. 4 (b)) by photo-generated carriers that can drive the hydrogen evolution reduction (HER, vs. NHE) and oxygen evolution reactions (OER, vs. NHE), respectively. Considering the effect of polarity of the g-ZnO/Si<sub>9</sub>C<sub>15</sub> heterojunction on the electron-hole separation, the corrected STH efficiency is:

$$\eta'_{\text{STH}} = \eta_{\text{STH}} \times \frac{\int_0^{\infty} P(\hbar\omega) d(\hbar\omega)}{\int_0^{\infty} P(\hbar\omega) d(\hbar\omega) + \Delta\Phi \int_{E_{\text{min}}}^{\infty} \frac{P(\hbar\omega)}{\hbar\omega} d(\hbar\omega)} \quad (6)$$

where  $\Delta\Phi$  the difference of vacuum level between such surfaces of the g-ZnO/Si<sub>9</sub>C<sub>15</sub> heterojunction.

### Part C: The calculation method of the power conversion efficiency (PCE)

The PCE ( $\eta_{\text{PCE}}$ ) of the g-ZnO/Si<sub>9</sub>C<sub>15</sub> heterojunction is calculated as follows:

$$\eta_{\text{PCE}} = \frac{\beta_{\text{FF}} J_{\text{SC}} V_{\text{OC}}}{P_{\text{Solar}}} = \frac{0.65 (E_{\text{g}} - E_{\text{CBO}} - 0.3) \int_{E_{\text{g}}}^{\infty} \frac{P(\hbar\omega)}{\hbar\omega} d(\hbar\omega)}{\int_0^{\infty} P(\hbar\omega) d(\hbar\omega)} \quad (7)$$

where the  $\beta_{\text{FF}}$  is the fill factor (0.65). The  $J_{\text{SC}}$  is short circuit current:  $E_{\text{g}} - E_{\text{CBO}} - 0.3$ ,

where  $E_{\text{g}}$  and  $E_{\text{CBO}}$  is donor bandgap and CB offset, respectively. The  $V_{\text{OC}}$  is the open

circuit voltage:  $\int_{E_{\text{g}}}^{\infty} \frac{P(\hbar\omega)}{\hbar\omega} d(\hbar\omega)$ , where  $P(\hbar\omega)$  is the AM 1.5G solar flux at the photon

energy  $\hbar\omega$ . The  $P_{\text{solar}}$  is the total incident solar power per unit area:  $\int_0^{\infty} P(\hbar\omega) d(\hbar\omega)$ .

### Part D: The Hydrogen evolution reaction (HER) process and the calculation method of reaction Gibbs free energy

The HER process consists of the following steps:

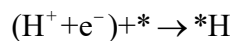

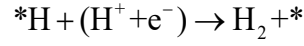

where \* indicates free site of absorbability on heterojunction surface. \*H represents H atom absorbed on the surfaces the g-ZnO/Si<sub>9</sub>C<sub>15</sub> heterojunction. Under standard conditions (pH= 0, P= 1 bar, T= 298.15 K), the Gibbs free energy of H<sup>+</sup> + e<sup>-</sup> corresponds to that of a half of H<sub>2</sub> molecule at NHE. Reaction Gibbs free energy (*G*) is calculated as follows:

$$G = \Delta E + \Delta ZPE - T\Delta S + \Delta G_U \quad (8)$$

where  $\Delta E$ ,  $\Delta ZPE$ , and  $TS$  represent adsorption energy, difference of zero-point energy, and difference of entropy (under the  $T = 298.15$  K), respectively. The  $\Delta G_U = -eU$  is the influence of voltage on energy, where  $e$  is the elementary charge, and  $U$  is the potential measured against the NHE. The repair of entropy and zero-point energy is obtained by vibration frequency calculation. The zero-point energy can be determined by the sum of all vibration modes and calculated as follows:

$$ZPE = 1/2 \sum_i^k h\nu_i \quad (9)$$

where  $h$  and  $\nu_i$  represent the Planck constant and the frequency corresponding to the  $i$ -th vibration mode, and  $k$  is the number of vibration modes. The  $TS$  values is calculated as follow:

$$TS = k_B T \left[ \sum_i^k \ln \left( \frac{1}{1 - e^{-h\nu_i/k_B T}} \right) + \sum_i^k \frac{h\nu_i}{k_B T} \left( \frac{1}{e^{h\nu_i/k_B T} - 1} \right) + 1 \right] \quad (10)$$

where  $k_B$  represents the Boltzmann constant. Ideally, when the theoretically applied voltage  $U = 0$  V, the HER can be spontaneously driven without additional power. The  $\eta^{\text{HER}}$  depends on the increment ( $\Delta G_{*H}$ ) of the Gibbs free energy in the reaction, and the

$\eta^{\text{HER}}$  is calculated as follows:

$$G^{\text{HER}} = \{\Delta G_{*H}\}$$

$$\eta^{\text{HER}} = G^{\text{HER}} / e \quad (11)$$

**Part E: The adsorption sites of H atom adsorbed on the Si<sub>9</sub>C<sub>15</sub> interface and the g-ZnO interface**

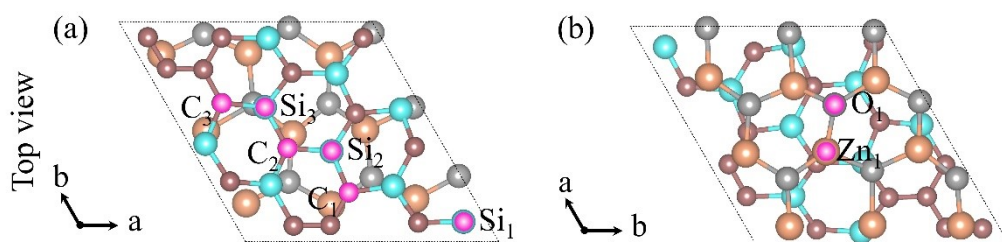

**Fig. S. 1** The crystal structure and adsorption site of H atom adsorbed on (a) Si<sub>9</sub>C<sub>15</sub> interface and (b) g-ZnO interface of the g-ZnO/ Si<sub>9</sub>C<sub>15</sub> heterojunction, respectively. The orange, gray, blue, brown, peach balls represent Zn, O, Si, C, H atoms, respectively. The purple sphere represents the adsorption site.
